# Supplementary material
Source: PubMed Central journal article supplement (PMC2922761)
Supplement: NIHMS185804-supplement-supplement_1.pdf [file NIHMS185804-supplement-supplement_1.pdf]

Online Table 1

*Level of Education and Individual Annual Income*

|                                  | <i>n</i> | %    |
|----------------------------------|----------|------|
| <b>Education</b>                 |          |      |
| Less than 12 <sup>th</sup> Grade | 5        | 2.1  |
| High School/GED                  | 15       | 6.2  |
| Tech/Vocational                  | 8        | 3.3  |
| Some College                     | 64       | 26.3 |
| Associates Degree                | 17       | 7.0  |
| Bachelor's Degree                | 74       | 30.5 |
| Graduate/Professional Degree     | 60       | 24.7 |
| <b>Individual Income</b>         |          |      |
| <\$10,000                        | 27       | 11.1 |
| \$10,000-\$19,999                | 23       | 9.5  |
| \$20,000-\$29,999                | 22       | 9.1  |
| \$30,000-\$39,999                | 24       | 9.9  |

|                     |    |      |
|---------------------|----|------|
| \$40,000-\$49,999   | 42 | 17.3 |
| \$50,000-\$59,999   | 23 | 9.5  |
| \$60,000-\$69,999   | 20 | 8.2  |
| \$70,000-\$79,999   | 12 | 4.9  |
| \$80,000-\$89,999   | 12 | 4.9  |
| \$90,000-\$99,999   | 6  | 2.5  |
| \$100,000-\$109,999 | 7  | 2.9  |
| \$110,000-\$119,999 | 4  | 1.6  |
| \$120,000-\$129,999 | 2  | 0.8  |
| \$130,000-\$139,999 | 2  | 0.8  |
| \$140,000-\$149,999 | 3  | 1.2  |
| >\$150,000          | 12 | 4.9  |
| Omission            | 2  | 0.8  |

---

Online Table 2

*Zero-order Correlations for Entire Sample*

|                           | <i>M</i> | <i>SD</i> | $\alpha$ | 1       | a          | b          | c          | d          | 2          | 3            |
|---------------------------|----------|-----------|----------|---------|------------|------------|------------|------------|------------|--------------|
| 1) GRCS Total Scores      | 115.97   | 30.36     | .93      | —       | (.70, .80) | (.80, .88) | (.76, .85) | (.65, .77) | (.22, .44) | (-.45, -.23) |
| a) Success Concern        | 48.36    | 12.62     | .87      | .75***  | —          | (.25, .46) | (.25, .46) | (.37, .57) | (.15, .38) | (-.38, -.15) |
| b) Restricted Emotions    | 28.10    | 11.36     | .90      | .84***  | .36***     | —          | (.76, .85) | (.36, .56) | (.15, .38) | (-.38, -.14) |
| c) Restricted Affection   | 19.38    | 7.82      | .81      | .81***  | .37***     | .81***     | —          | (.32, .53) | (.16, .39) | (-.37, -.13) |
| d) Work/School Concern    | 20.12    | 7.01      | .81      | .71***  | .47***     | .46***     | .44***     | —          | (.07, .31) | (-.43, -.21) |
| 2) Interest in Casual Sex | 40.52    | 12.62     | .81      | .33***  | .27***     | .27***     | .28***     | .19**      | —          | (-.36, -.12) |
| 3) Social Desirability    | 6.26     | 2.53      | .55      | -.34*** | -.27***    | -.26***    | -.24***    | -.32***    | -.24***    | —            |

*Note.*  $N = 243$ ; 95% confidence intervals are above the diagonal in parenthesis.

\*  $p < .05$ . \*\*  $p < .01$ . \*\*\*  $p < .001$  one-tailed.

Online Table 3  
Zero-order Correlations by Group

|                              | 1      | a      | b      | c      | d      | 2       | 3     | 4   | 5       |
|------------------------------|--------|--------|--------|--------|--------|---------|-------|-----|---------|
| 1) GRCS Total Scores         | —      | .79*** | .88*** | .84*** | .74*** | .31***  | —     | —   | -.40*** |
| a) Success Concern           | .75*** | —      | .48*** | .48*** | .51*** | .23**   | —     | —   | -.36*** |
| b) Restricted Emotions       | .79*** | .28**  | —      | .83*** | .57*** | .28**   | —     | —   | -.30*** |
| c) Restricted Affection      | .79*** | .32*** | .79*** | —      | .47*** | .30***  | —     | —   | -.27**  |
| d) Work/School Concern       | .68*** | .46*** | .33*** | .41*** | —      | .19*    | —     | —   | -.38*** |
| 2) Interest in Casual Sex    | .35*** | .37*** | .24**  | .22*   | .18*   | —       | —     | —   | -.26**  |
| 3) Relationship Length       | -.10   | -.05   | -.11   | -.11   | -.04   | .02     | —     | —   | —       |
| 4) Relationship Satisfaction | -.08   | .07    | -.19*  | -.12   | -.01   | -.45*** | .25** | —   | —       |
| 5) Social Desirability       | -.27** | -.22** | -.20*  | -.15   | -.25** | -.18*   | .06   | .12 | —       |

*Note.* Above the diagonal line are the  $r$ -values for the single gay men; below the diagonal line are the  $r$ -values for the partnered gay men.

\*  $p < .05$ . \*\*  $p < .01$ . \*\*\*  $p < .001$  one-tailed.

Online Table 4

*Partial Correlations for the Entire Sample*

|                           | 1      | a          | b          | c          | d          | 2           |
|---------------------------|--------|------------|------------|------------|------------|-------------|
| 1) GRCS Total Scores      | —      | (.66, .79) | (.78, .86) | (.76, .85) | (.60, .74) | (.15, .38)  |
| a) Success Concern        | .73*** | —          | (.19, .43) | (.21, .43) | (.31, .52) | (.10, .34)  |
| b) Restricted Emotions    | .82*** | .31***     | —          | (.76, .85) | (.31, .51) | (.10, .34)  |
| c) Restricted Affection   | .80*** | .32***     | .80***     | —          | (.29, .50) | (.11, .35)  |
| d) Work/School Concern    | .67*** | .42***     | .41***     | .40***     | —          | (-.01, .25) |
| 2) Interest in Casual Sex | .27*** | .22***     | .22***     | .23***     | .12*       | —           |

*Note.*  $N = 243$ ; 95% confidence intervals are above the diagonal in parenthesis.

\*  $p < .05$ . \*\*  $p < .01$ . \*\*\*  $p < .001$  one-tailed.

Online Table 5

*Partial Correlations for Single Gay Men*

|                           | 1      | a          | b          | c          | d          | 2           |
|---------------------------|--------|------------|------------|------------|------------|-------------|
| 1) GRCS Total Scores      | —      | (.66, .82) | (.83, .91) | (.77, .88) | (.59, .78) | (.06, .39)  |
| a) Success Concern        | .75*** | —          |            | (.26, .55) | (.29, .56) | (-.02, .32) |
| b) Restricted Emotions    | .87*** | .41***     | —          | (.76, .88) | (.38, .64) | (.05, .38)  |
| c) Restricted Affection   | .83*** | .43***     | .82***     | —          | (.26, .55) | (.07, .40)  |
| d) Work/School Concern    | .69*** | .43***     | .51***     | .41***     | —          | (-.07, .27) |
| 2) Interest in Casual Sex | .23*** | .15        | .22**      | .24**      | .10        | —           |

*Note.*  $n = 129$ ; 95% confidence intervals are above the diagonal in parenthesis.

\*  $p < .05$ . \*\*  $p < .01$ . \*\*\*  $p < .001$  one-tailed.

Online Table 6

*Partial Correlations for Partnered Gay Men*

|                              | 1      | a          | b          | c          | d          | 2           | 3           | 4           |
|------------------------------|--------|------------|------------|------------|------------|-------------|-------------|-------------|
| 1) GRCS Total Scores         | —      | (.64, .81) | (.70, .85) | (.72, .86) | (.53, .75) | (.15, .48)  | (-.26, .12) | (-.24, .14) |
| a) Success Concern           | .73*** | —          | (.07, .42) | (.11, .45) | (.27, .58) | (.17, .50)  | (-.24, .14) | (-.09, .29) |
| b) Restricted Emotions       | .78*** | .25**      | —          | (.72, .86) | (.12, .46) | (.03, .38)  | (-.26, .12) | (-.35, .01) |
| c) Restricted Affection      | .79*** | .29**      | .79***     | —          | (.23, .54) | (.01, .37)  | (-.25, .13) | (-.29, .08) |
| d) Work/School Concern       | .65*** | .43***     | .30**      | .39***     | —          | (-.05, .32) | (-.20, .18) | (.18, .20)  |
| 2) Interest in Casual Sex    | .32*** | .34***     | .21*       | .19*       | .14        | —           | (-.19, .19) | (.29, .58)  |
| 3) Relationship Length       | -.07   | -.05       | -.07       | -.06       | -.01       | .00         | —           | (.06, .41)  |
| 4) Relationship Satisfaction | -.05   | .10        | -.17*      | -.11       | .01        | -.44***     | .24*        | —           |

*Note.* Social desirability has been controlled for; 95% confidence intervals are above the diagonal in parenthesis.

\*  $p < .05$ . \*\*  $p < .01$ . \*\*\*  $p < .001$  one-tailed.

Online Table 7: Regression Coefficients on Interest in Casual Sex Among Whole Sample

|                                  | Unstandardized |        | $\beta$ | $t$      | 95% Confidence Interval |       | Correlation |         |      |
|----------------------------------|----------------|--------|---------|----------|-------------------------|-------|-------------|---------|------|
|                                  | $B$            | $SE B$ |         |          | Lower                   | Upper | Zero-order  | Partial | Part |
| Step 1                           |                |        |         |          |                         |       |             |         |      |
| (Constant)                       | 48.04          | 2.11   |         | 22.76*** | 43.89                   | 52.20 |             |         |      |
| Social Desirability              | -1.20          | 0.31   | -.24    | -3.84*** | -1.82                   | -0.59 | -.24        | -.24    | -.24 |
| Step 2                           |                |        |         |          |                         |       |             |         |      |
| (Constant)                       | 25.90          | 5.46   |         | 4.75***  | 15.15                   | 36.65 |             |         |      |
| Social Desirability              | -0.76          | 0.33   | -.15    | -2.35*   | -1.40                   | -0.13 | -.24        | -.15    | -.14 |
| Success Concern                  | 0.17           | 0.07   | .17     | 2.38*    | 0.03                    | 0.31  | .27         | .15     | .14  |
| Restricted Intimacy <sup>+</sup> | 1.84           | 0.66   | .20     | 2.78**   | 0.54                    | 3.15  | .28         | .18     | .17  |
| Work/School Concern              | -0.06          | 0.13   | -0.03   | -0.43    | -0.32                   | 0.21  | .19         | -.03    | -.03 |

Note.  $N = 243$ ;  $R^2 = .06$  for Step 1;  $\Delta R^2 = .07$  for Step 2; <sup>+</sup> Square root transformation used.

\*  $p < .05$ . \*\*  $p < .01$ . \*\*\*  $p < .001$ .



Online Table 8: Regression Coefficients on Interest in Casual Sex Among Single Gay Men

|                                  | Unstandardized |        | $\beta$ | $t$      | 95% Confidence Interval |       | Correlation |         |      |
|----------------------------------|----------------|--------|---------|----------|-------------------------|-------|-------------|---------|------|
|                                  | $B$            | $SE B$ |         |          | Lower                   | Upper | Zero-order  | Partial | Part |
| Step 1                           |                |        |         |          |                         |       |             |         |      |
| (Constant)                       | 49.56          | 2.56   |         | 19.40*** | 44.50                   | 54.61 |             |         |      |
| Social Desirability              | -1.21          | 0.39   | -.26    | -3.08**  | -1.99                   | -0.43 | -.26        | -.26    | -.26 |
| Step 2                           |                |        |         |          |                         |       |             |         |      |
| (Constant)                       | 31.61          | 7.21   |         | 4.38***  | 17.33                   | 45.88 |             |         |      |
| Social Desirability              | -0.85          | 0.43   | -.18    | -1.98*   | -1.69                   | -.01  | -.26        | -.18    | -.17 |
| Success Concern                  | 0.07           | 0.11   | .07     | 0.62     |                         | 0.27  | .23         | .06     | .05  |
|                                  |                |        |         |          | -0.14                   |       |             |         |      |
| Restricted Intimacy <sup>+</sup> | 2.03           | 0.94   | .23     | 2.17*    | 0.18                    | 3.88  | .30         | .19     | .18  |
| Work/School Concern              | -0.06          | 0.19   | -0.04   | -0.34    | -0.44                   | 0.31  | .19         | -.03    | -.03 |

Note.  $n = 129$ ;  $R^2 = .07$  for Step 1;  $\Delta R^2 = .06$  for Step 2; <sup>+</sup> Square root transformation used.

\*  $p < .05$ . \*\*  $p < .01$ . \*\*\*  $p < .001$ .

Online Table 9: Regression Coefficients on Interest in Casual Sex Among Partnered Gay Men

|                                  | Unstandardized |        | $\beta$ | $t$      | 95% Confidence Interval |       | Correlation |         |      |
|----------------------------------|----------------|--------|---------|----------|-------------------------|-------|-------------|---------|------|
|                                  | $B$            | $SE B$ |         |          | Lower                   | Upper | Zero-order  | Partial | Part |
| Step 1                           |                |        |         |          |                         |       |             |         |      |
| (Constant)                       | 45.05          | 3.57   |         | 12.61*** | 37.97                   | 52.12 |             |         |      |
| Social Desirability              | -1.00          | 0.51   | -.18    | -1.96*   | -2.01                   | -0.01 | -.18        | -.18    | -.18 |
| Step 2                           |                |        |         |          |                         |       |             |         |      |
| (Constant)                       | 17.75          | 8.19   |         | 2.17*    | 1.52                    | 33.98 |             |         |      |
| Social Desirability              | -0.52          | 0.50   | -.09    | -1.03    | -1.51                   | 0.48  | -.18        | -.10    | -.09 |
| Success Concern                  | 0.33           | 0.10   | .33     | 3.25**   | 0.13                    | 0.52  | .37         | .30     | .29  |
| Restricted Intimacy <sup>+</sup> | 1.46           | 0.96   | .15     | 1.52     | -0.44                   | 3.37  | .24         | .14     | .13  |
| Work/School Concern              | -0.10          | 0.19   | -.05    | -0.52    | -0.47                   | 0.28  | .18         | -.05    | -.05 |

Note.  $n = 113$ ;  $R^2 = .03$  for Step 1;  $\Delta R^2 = .13$  for Step 2; <sup>+</sup> Square root transformation used.

\*  $p < .05$ . \*\*  $p < .01$ . \*\*\*  $p < .001$ .

Online Table 10: Hierarchical Multiple Regression for Variables Predicting Relationship Satisfaction

|                                  | Unstandardized |        | $\beta$ | $t$      | 95% Confidence Interval |       | Correlation |         |      |
|----------------------------------|----------------|--------|---------|----------|-------------------------|-------|-------------|---------|------|
|                                  | $B$            | $SE B$ |         |          | Lower                   | Upper | Zero-order  | Partial | Part |
| Step 1                           |                |        |         |          |                         |       |             |         |      |
| (Constant)                       | 26.56          | 1.50   |         | 17.68*** | 23.58                   | 29.54 |             |         |      |
| Social Desirability              | 0.30           | 0.21   | .13     | 1.39     | -0.13                   | 0.72  | .13         | .13     | .13  |
| Step 2                           |                |        |         |          |                         |       |             |         |      |
| (Constant)                       | 28.05          | 3.64   |         | 7.71***  | 20.84                   | 35.25 |             |         |      |
| Social Desirability              | 0.31           | 0.22   | .14     | 1.39     | -0.13                   | 0.75  | .13         | .13     | .13  |
| Success Concern                  | 0.06           | 0.04   | .16     | 1.44     | -0.02                   | 0.15  | .08         | .14     | .13  |
| Restricted Intimacy <sup>+</sup> | -0.78          | 0.42   | -.19    | -1.87    | -1.60                   | 0.05  | -.17        | -.18    | -.18 |
| Work/School Concern              | 0.02           | 0.08   | .03     | 0.23     | -0.14                   | 0.18  | -.01        | .02     | .02  |
| Step 3                           |                |        |         |          |                         |       |             |         |      |
| (Constant)                       | 31.70          | 3.24   |         | 9.79***  | 25.28                   | 38.12 |             |         |      |
| Social Desirability              | 0.21           | 0.20   | .09     | 1.06     | -0.18                   | 0.59  | .13         | .10     | .09  |
| Success Concern                  | 0.13           | 0.04   | .33     | 3.32**   | 0.05                    | 0.21  | .08         | .31     | .27  |

|                                  |       |      |      |          |       |       |      |      |      |
|----------------------------------|-------|------|------|----------|-------|-------|------|------|------|
| Restricted Intimacy <sup>+</sup> | -0.47 | 0.37 | -.12 | -1.27    | -1.19 | 0.26  | -.17 | -.12 | -.10 |
| Work/School Concern              | 0.00  | 0.07 | .00  | -0.03    | -0.14 | 0.14  | -.01 | .00  | .00  |
| Interest in Casual Sex           | -0.21 | 0.04 | -.52 | -5.86*** | -0.28 | -0.14 | -.45 | -.49 | -.48 |
| Step 4                           |       |      |      |          |       |       |      |      |      |
| (Constant)                       | 29.16 | 3.19 |      | 9.14***  | 22.83 | 35.48 |      |      |      |
| Social Desirability              | 0.18  | 0.19 | .08  | 0.97     | -0.19 | 0.55  | .13  | .09  | .08  |
| Success Concern                  | 0.14  | 0.04 | .34  | 3.59**   | 0.06  | 0.21  | .08  | .33  | .28  |
| Restricted Intimacy <sup>+</sup> | -0.35 | 0.35 | -.09 | -1.00    | -1.05 | 0.35  | -.17 | -.10 | -.08 |
| Work/School Concern              | 0.00  | 0.07 | -.01 | -0.08    | -0.14 | 0.13  | -.01 | -.01 | -.01 |
| Interest in Casual Sex           | -0.22 | 0.04 | -.54 | -6.32*** | -0.29 | -0.15 | -.45 | -.52 | -.49 |
| Relationship Length <sup>+</sup> | 1.18  | 0.36 | .26  | 3.31**   | 0.47  | 1.89  | .25  | .31  | .26  |

Note.  $n = 113$ ;  $R^2 = .02$  for Step 1;  $\Delta R^2 = .04$  for Step 2;  $\Delta R^2 = .23$  for Step 3;  $\Delta R^2 = .07$  for Step 4; Total  $R^2 = .36$ ;  $\Delta F = 1.94$  for

Step 1;  $\Delta F = 1.67$  for Step 2;  $\Delta F = 34.36***$  for Step 3;  $\Delta F = 10.95**$  for Step 4; <sup>+</sup> Square root transformation used.

\*  $p < .05$ . \*\*  $p < .01$ . \*\*\*  $p < .001$ .
